# Supplementary material
Source: PubMed Central journal article supplement (PMC8498933)
Supplement: jamaoncol-e214301-s004.pdf [file jamaoncol-e214301-s004.pdf]

\*Indicates required information. Only first name, last name, and suffix will appear in PubMed.

| <b>*Group Name(s): PARSIFAL Steering Committee and Trial Investigators</b> |                   |                              |                  |             |                                          |                                                         |                                                                                            |
|----------------------------------------------------------------------------|-------------------|------------------------------|------------------|-------------|------------------------------------------|---------------------------------------------------------|--------------------------------------------------------------------------------------------|
| <b>*First Name and Middle Initial(s)</b>                                   | <b>*Last Name</b> | <b>*Suffix (eg, Jr, III)</b> | Academic Degrees | Institution | Location (city, state/province, country) | Role or Contribution, eg, chair, principal investigator | Group (if more than 1 Group listed in the byline) and/or Subgroup (eg, Steering Committee) |
| Antonio                                                                    | Antón             |                              |                  |             |                                          |                                                         |                                                                                            |
| Vladimir                                                                   | Moiseyenko        |                              |                  |             |                                          |                                                         |                                                                                            |
| Paul                                                                       | Cottu             |                              |                  |             |                                          |                                                         |                                                                                            |
| Gemma                                                                      | Viñas             |                              |                  |             |                                          |                                                         |                                                                                            |
| Thierry                                                                    | Petit             |                              |                  |             |                                          |                                                         |                                                                                            |
| Petra                                                                      | Tesarova          |                              |                  |             |                                          |                                                         |                                                                                            |
| Vladimir                                                                   | Vladimirov        |                              |                  |             |                                          |                                                         |                                                                                            |
| Juan                                                                       | Cueva Bañuelos    |                              |                  |             |                                          |                                                         |                                                                                            |
| Marco                                                                      | Colleoni          |                              |                  |             |                                          |                                                         |                                                                                            |
| Gianfilippo                                                                | Bertelli          |                              |                  |             |                                          |                                                         |                                                                                            |
| Purificación                                                               | Martínez          |                              |                  |             |                                          |                                                         |                                                                                            |
| Raquel                                                                     | Andres            |                              |                  |             |                                          |                                                         |                                                                                            |
| Tatiana                                                                    | Barannikova       |                              |                  |             |                                          |                                                         |                                                                                            |
| Sonia                                                                      | Servitja          |                              |                  |             |                                          |                                                         |                                                                                            |
| Jacques                                                                    | Medioni           |                              |                  |             |                                          |                                                         |                                                                                            |
| Saverio                                                                    | Cinieri           |                              |                  |             |                                          |                                                         |                                                                                            |
| Juan                                                                       | Bayo              |                              |                  |             |                                          |                                                         |                                                                                            |
| Santiago                                                                   | González          |                              |                  |             |                                          |                                                         |                                                                                            |
| Bohuslav                                                                   | Melichar          |                              |                  |             |                                          |                                                         |                                                                                            |
| Vicente                                                                    | Caranyana         |                              |                  |             |                                          |                                                         |                                                                                            |
| Francesco                                                                  | Atzori            |                              |                  |             |                                          |                                                         |                                                                                            |
| Mark                                                                       | Beresford         |                              |                  |             |                                          |                                                         |                                                                                            |
| Steven                                                                     | Chan              |                              |                  |             |                                          |                                                         |                                                                                            |
| Maria                                                                      | Luque-Cabal       |                              |                  |             |                                          |                                                         |                                                                                            |
| Juan                                                                       | de la Haba        |                              |                  |             |                                          |                                                         |                                                                                            |
| Joachim                                                                    | Bischoff          |                              |                  |             |                                          |                                                         |                                                                                            |

Supplemental Online Content: Nonauthor Collaborators

\*Indicates required information. Only first name, last name, and suffix will appear in PubMed.

| <b>*First Name and Middle Initial(s)</b> | <b>*Last Name</b> | <b>*Suffix (eg, Jr, III)</b> | Academic Degrees | Institution | Location (city, state/province, country) | Role or Contribution, eg, chair, principal investigator | Group (if more than 1 Group listed in the byline) and/or Subgroup (eg, Steering Committee) |
|------------------------------------------|-------------------|------------------------------|------------------|-------------|------------------------------------------|---------------------------------------------------------|--------------------------------------------------------------------------------------------|
| Guzel                                    | Mukhametsina      |                              |                  |             |                                          |                                                         |                                                                                            |
| Maria                                    | Cazzaniga         |                              |                  |             |                                          |                                                         |                                                                                            |
| Daniele                                  | Generali          |                              |                  |             |                                          |                                                         |                                                                                            |
| Andrew                                   | Wardley           |                              |                  |             |                                          |                                                         |                                                                                            |
| Laura                                    | Cortesi           |                              |                  |             |                                          |                                                         |                                                                                            |
| Luigi                                    | Cavanna           |                              |                  |             |                                          |                                                         |                                                                                            |
| Mario                                    | Airoldi           |                              |                  |             |                                          |                                                         |                                                                                            |
